# Supplementary material for: Sulphur-promoted growth of Mo 6 S 2 I 8 nanowires via a metastable MoI 2− x S x intermediate
Source: Royal Society of Chemistry journal article supplement (doi:10.1039/d5na01101a), 2026-01-01
Supplement: d5na01101a1.pdf [file d5na01101a1.pdf]

# Sulphur-promoted growth of $\text{Mo}_6\text{S}_2\text{I}_8$ nanowires via a metastable $\text{MoI}_{2-x}\text{S}_x$ intermediate

Anja Pogačnik Krajnc<sup>a, b</sup>, Janko Jelenc<sup>a</sup>, Luka Pirker<sup>a</sup>, Srečo D Škapin<sup>a</sup> and Maja Remškar<sup>a</sup>

<sup>a</sup>Jozef Stefan Institute, Jamova cesta 39, SI-1000, Ljubljana, Slovenia

<sup>b</sup>Faculty of Mathematics and Physics, Jadranska ulica 19, SI-1000 Ljubljana, Slovenia

## Supplementary information

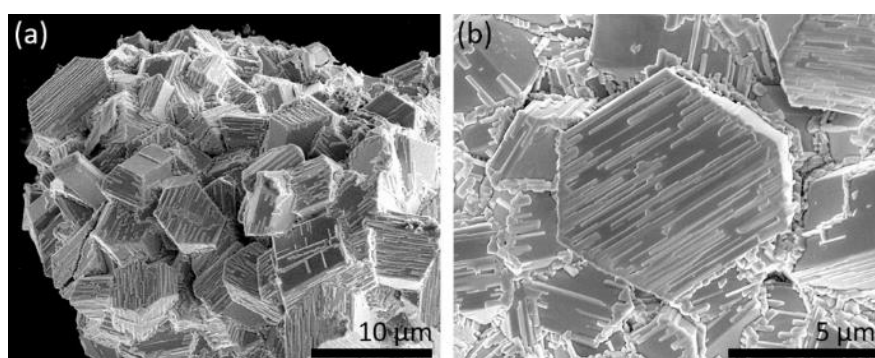

**Fig. S1:** (a)  $\text{MoI}_2$  foil synthesized under conditions comparable to those used for Mo-S-I compound featuring nanowires (NWs). The temperature gradient was set to 1133-1073 K. In this instance, compound did not grow in the shape of nanowires, but the morphology of  $\text{MoI}_2$  crystals aligns with those found in the Mo-S-I compound reported in this paper; (b) Six facets of the formed orthorhombic  $\text{MoI}_2$  crystal.

EDS (30 kV, 1.6 nA) identifies 31.8 % of Mo and 68.2 % of I. Sulphur was not found, indicating that sulphur did not integrate into the structure during synthesis. The absence of NWs formation implies that the binding of sulphur is essential for effective Mo-S-I NWs synthesis.

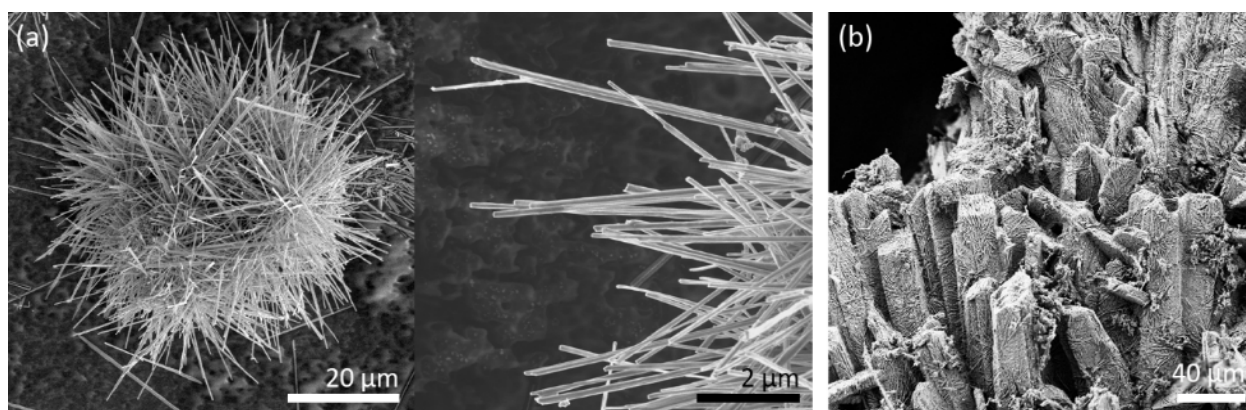

**Fig. S2:** Scanning electron images of compounds used for analysis of XRD spectra of Mo-S-I: (a)  $\text{Mo}_6\text{S}_2\text{I}_8$  nanowires, grow in the shape of a see-urchin in the high-temperature zone of the ampoule. Nanowires are up to 100  $\mu\text{m}$  long and between 100-200 nm long [1-2]. (b)  $\text{MoI}_2$  rods synthesized by CVT without the presence of sulphur.

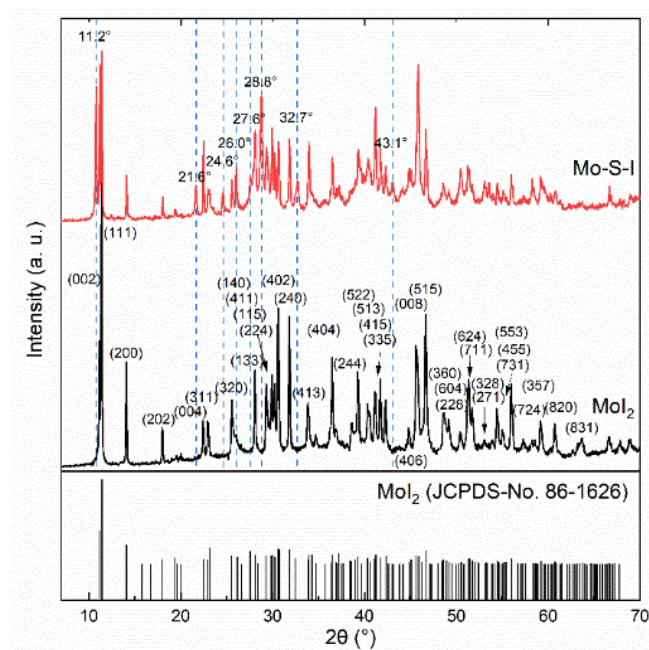

**Fig. S3:** XRD patterns of Mo-S-I transported material compared to pure  $\text{MoI}_2$  and JCPDS card of  $\text{MoI}_2$ .

**Table S1:** List of observed XRD peaks and assigned crystallographic planes for peaks measured in  $\text{MoI}_2$  rods (Figure S2b) and mixed Mo-S-I peaks. Additional peaks of Mo-S-I are found in the first column:

| Additional peaks<br>Mo-S-I compound | Mo-S-I compound | JCPDS-No. 86-1626 |   |   |   |
|-------------------------------------|-----------------|-------------------|---|---|---|
|                                     | $2\theta$ (°)   | d (Å)             | h | k | l |
| 11.2                                | 11.189          | 7.9015            | 0 | 0 | 2 |
|                                     | 11.418          | 7.74329           | 1 | 1 | 1 |
|                                     | 14.089          | 6.28100           | 2 | 0 | 0 |
|                                     | 18.027          | 4.91682           | 2 | 0 | 2 |
| 21.6                                | 22.487          | 3.95075           | 0 | 0 | 4 |
|                                     | 23.128          | 3.84266           | 3 | 1 | 1 |
| 24.6                                | 25.54           | 3.48407           | 3 | 2 | 0 |
| 26.0                                |                 |                   |   |   |   |
| 27.6                                |                 |                   |   |   |   |
| 28.8                                | 28.112          | 3.17168           | 1 | 3 | 3 |
|                                     | 29.290          | 3.04673           | 1 | 4 | 0 |
|                                     | 29.842          | 2.99164           | 4 | 1 | 1 |
|                                     | 29.984          | 2.97772           | 1 | 1 | 5 |
|                                     | 30.253          | 2.9518            | 2 | 2 | 4 |
|                                     | 30.608          | 2.91843           | 4 | 0 | 2 |
|                                     | 31.832          | 2.80895           | 2 | 4 | 0 |
| 32.7                                | 33.964          | 2.63737           | 4 | 1 | 3 |
|                                     | 36.520          | 2.45841           | 4 | 0 | 4 |
|                                     | 39.325          | 2.28930           | 2 | 4 | 4 |
|                                     | 40.279          | 2.23725           | 5 | 2 | 2 |
|                                     | 40.385          | 2.231             | 5 | 1 | 3 |
|                                     | 41.118          | 2.19352           | 4 | 1 | 5 |
|                                     | 41.769          | 2.16082           | 3 | 3 | 5 |
| 43.1                                | 44.878          | 2.01806           | 4 | 0 | 6 |
|                                     | 45.903          | 1.97538           | 0 | 0 | 8 |
|                                     | 46.711          | 1.94306           | 5 | 1 | 5 |
|                                     | 48.579          | 1.87263           | 3 | 6 | 0 |

|        |         |   |   |   |
|--------|---------|---|---|---|
| 49.214 | 1.84995 | 6 | 0 | 4 |
| 50.527 | 1.80490 | 2 | 2 | 8 |
| 51.453 | 1.77458 | 6 | 2 | 4 |
| 51.740 | 1.76541 | 7 | 1 | 1 |
| 53.265 | 1.71839 | 3 | 2 | 8 |
| 53.368 | 1.71533 | 2 | 7 | 1 |
| 54.464 | 1.68338 | 5 | 5 | 3 |
| 55.049 | 1.66685 | 4 | 5 | 5 |
| 55.136 | 1.66443 | 1 | 5 | 7 |
| 56.008 | 1.64056 | 7 | 3 | 1 |
| 58.345 | 1.58030 | 7 | 2 | 4 |
| 59.238 | 1.55858 | 3 | 5 | 7 |
| 60.750 | 1.52337 | 8 | 2 | 0 |
| 63.495 | 1.46395 | 8 | 3 | 1 |

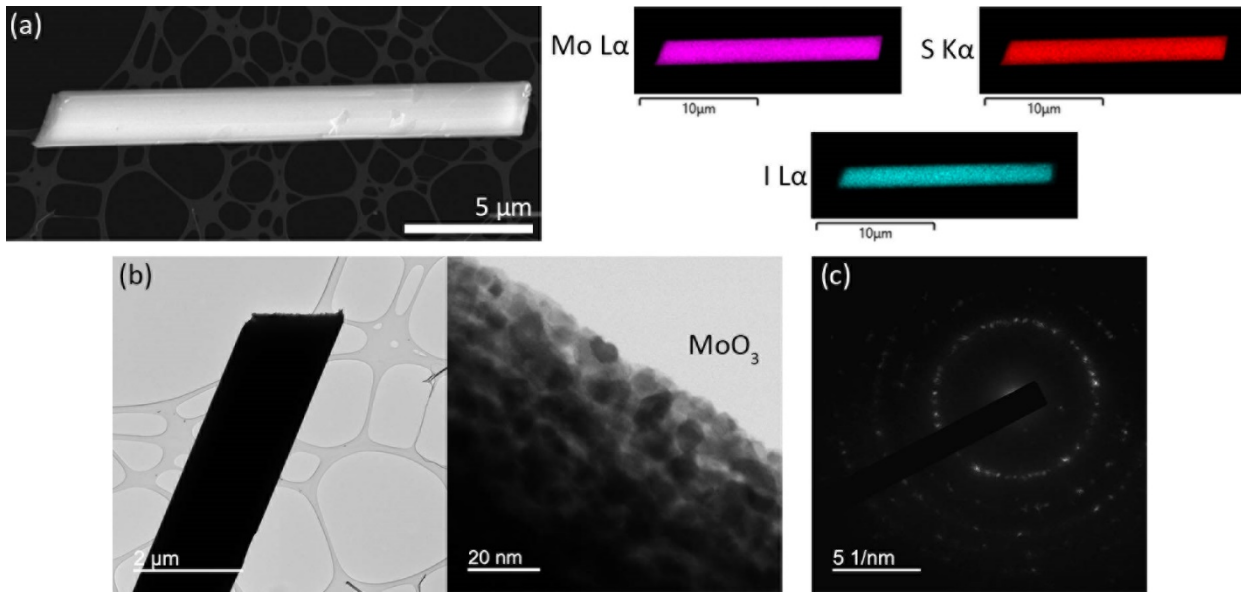

**Fig. S4:** (a) Partially melted Mo-S-I plate has an even distribution of elements. EDS detects a lower percentage of S on this plate compared to the percentages observed on the nanowires: 1.3 % of S, 33.4 % of Mo and 65.2 % of I; (b) TEM image of the rod that is less stable under electron flux which is noticeable as a decomposition into  $\text{MoO}_3$  nanoparticles; (c) SAED pattern of decomposed nanoparticles.

**Table S2:** Raman mode wavenumbers obtained from the Raman spectra seen in Figure 4c:

|                           | Position of peaks (cm <sup>-1</sup> ) |       |       |       |       |       |       |       |       |       |       |
|---------------------------|---------------------------------------|-------|-------|-------|-------|-------|-------|-------|-------|-------|-------|
| 532nm<br>rod<br>foil      |                                       |       |       |       |       |       |       |       |       |       |       |
|                           | 95.3                                  | 115.9 | 127.5 | 137.7 | 163.4 | 219.3 | 286   | 322   |       |       |       |
|                           | 95.0                                  | 117   | 127.0 | 138.9 | 165.9 | 220.6 | 285   |       |       |       |       |
| 633nm<br>rod<br>foil      |                                       |       |       |       |       |       |       |       |       |       |       |
|                           | 78.7                                  | 95.0  | 106.5 | 116   | 128   | 139.5 | 147.9 | 164.7 | 220   | 284.4 | 320.5 |
|                           | 76.7                                  | 93.9  | 105.3 | 115.9 | 128.1 | 137.9 | 147.6 | 164.5 | 221   | 284   | 320.6 |
| 532nm<br>Mol <sub>2</sub> | 72.1                                  | 86.8  | 97.7  | 115.7 | 129.3 | 132.2 | 158.0 | 217.8 | 280.8 | 289.4 |       |

# Calibration of work function using HOPG substrate

To determine the work function of Mo-S-I nanowires through contact potential difference ( $V_{CPD}$ ), we calibrated our AFM tip with the epitaxial gold Au(111) thin film substrate (Phasis Sàrl, Geneva – Switzerland) utilizing the known work function of freshly cleaved highly pyrolytic graphite (HOPG) (SPI Supplies, grade SPI-1):  $\phi_{HOPG} = 4.60 \pm 0.05$  eV (Fig. S5) [3].

The relation between an AFM tip WF ( $\phi_{TIP}$ ), a sample WF ( $\phi_{SAMPLE}$ ) and the CPD for Omicron VT AFM ( $V_{CPD}$ ) using Matrix software is defined as  $V_{CPD} = (\phi_{SAMPLE} - \phi_{TIP})/e$ , with  $e$  representing the elementary charge. A CPD scan was conducted on the HOPG substrate. The average value of HOPG's CPD was estimated from the line profiles indicated on Fig. S2d:  $V_{CPD\ HOPG} = 100$  mV  $\pm$  1 mV. The work function of the tip is then  $4.50$  eV  $\pm$   $0.02$  eV. An average Au(111)'s CPD was calculated from Fig. S5b:  $V_{CPD\ Au} = 119$  mV  $\pm$  1 mV. By employing the work function of tip alongside the typical Au(111)'s CPD value, we successfully calculated the work function of Au(111) :

$$\phi_{Au} = e V_{CPD\ Au} + \phi_{TIP} = 4.62 \text{ eV} \pm 0.02 \text{ eV} .$$

From this point, we established the work function values of an individual nanowire resting on the Au(111) substrate:

$$\phi_{NW} = \phi_{CPD\ NW} + e \phi_{Au} .$$

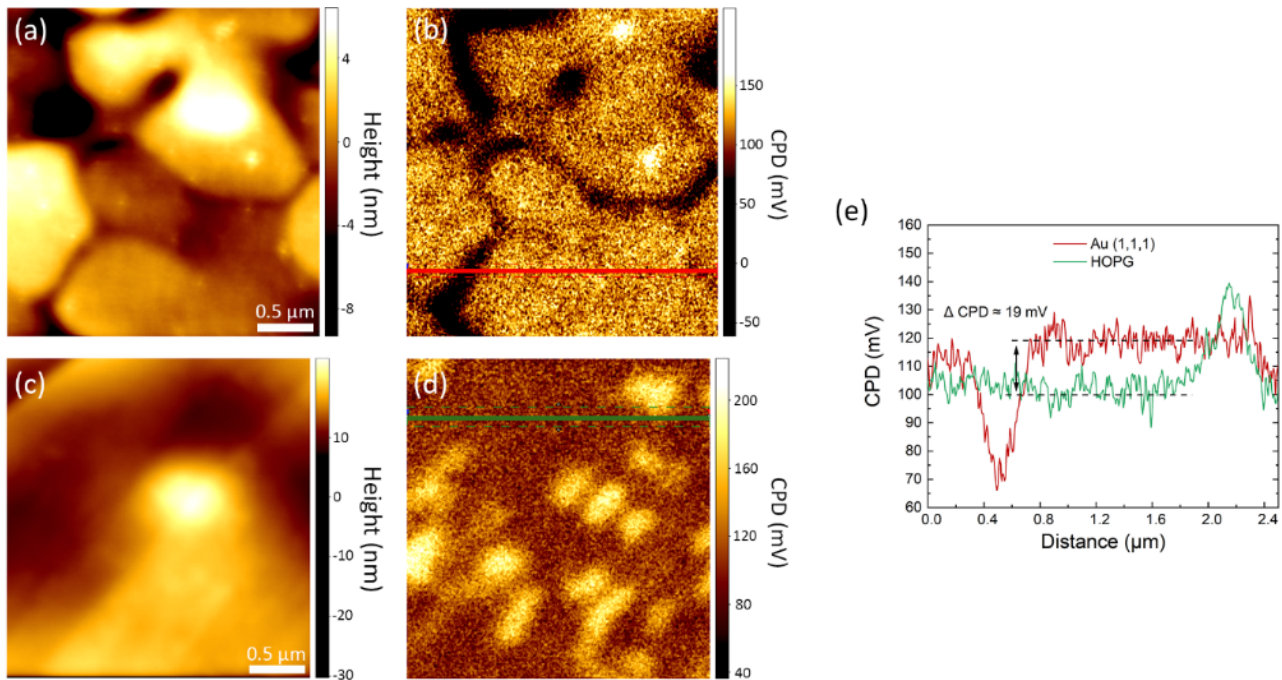

**Fig. S5:** Topography AFM and corresponding CPD images of (a-b) Au(111) and (c-d) freshly cleaved HOPG substrate; (e) Line profiles of CPD difference between substrates was acquired by averaging 10 lines that are marked on the (b) and (d) image. Au(111) has a  $19 \text{ mV} \pm 1 \text{ mV}$  higher CPD compared to freshly cleaved HOPG.



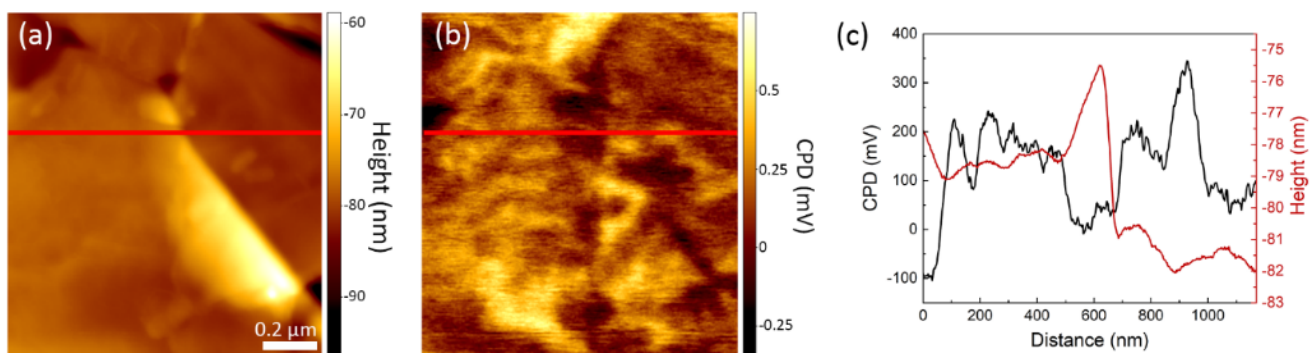

**Fig. S6:** (a) Topography AFM, (c) CPD image and (b) line profiles obtained on marked region of the backside of Mo-S-I. Kelvin scans show an inhomogeneous structure of the back side of Mo-S-I. The size of CPD mostly varies between 100-200 mV. In some places it can also go as high as 300 mV or as low as 10 mV.

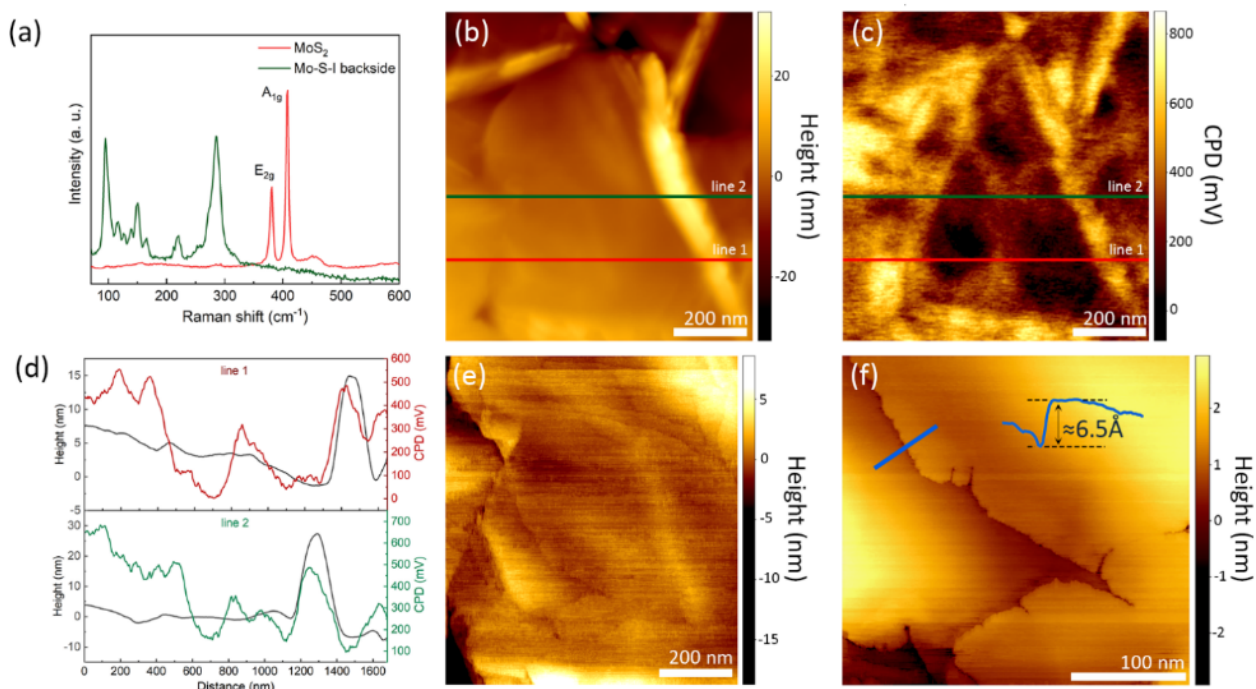

**Fig. S7:** Triangular shaped MoS<sub>2</sub> flakes growing on the back of Mo-S-I compound (seen in Fig 1d): (a) Raman spectrum on the triangular layered growth differs from the rest of the spectra measured on Mo-S-I. Peak at  $379 \text{ cm}^{-1} \pm 0.1 \text{ cm}^{-1}$  is assigned as E<sub>2g</sub> (in-plane) mode and  $406 \text{ cm}^{-1} \pm 0.1 \text{ cm}^{-1}$  is A<sub>1g</sub> (out-of-plane) MoS<sub>2</sub> mode. Positions of peaks were determined by fitting the data with Lorentzian function; (b) Topography AFM image and (c) simultaneous CPD scan of the area. (d) Topography and CPD line profiles, obtained from the red (line 1) and green line (line 2). A CPD contrast between Mo-S-I and MoS<sub>2</sub> is noticeable with MoS<sub>2</sub> having from 100 and up to 400 mV lower CPD. MoS<sub>2</sub> grows in multiple layers as seen on (d) STM image (3.5 V, 1 nA); (e) The thickness of layer, measured on the left corner of the triangle ( $\approx 6.5 \text{ \AA}$ ), is in good agreement with a thickness of MoS<sub>2</sub> monolayer [4], confirming the MoS<sub>2</sub> growth on the backside of Mo-S-I.

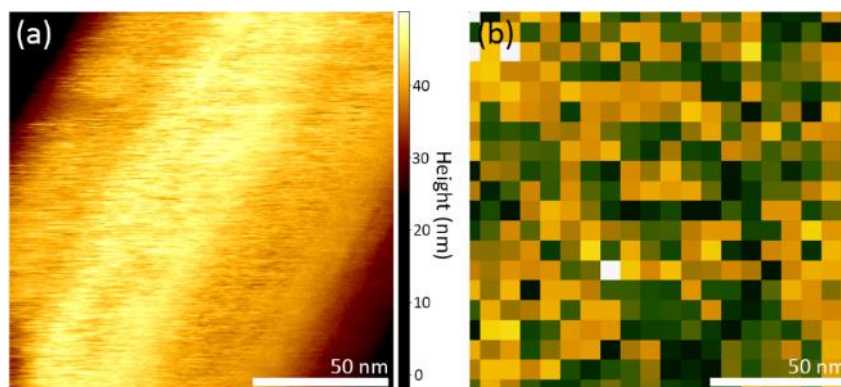

**Fig. S8:** Mo-S-I nanowire: (a) STM image with corresponding (b) current-imaging-tunnelling spectroscopy (CITS) image (-4.5 V, 0.3 nA).

## References

- [1] Marko Viršek, Matthias Krause, Andreas Kolitsch, Aleš Mrzel, Ivan Iskra, Srečo D. Škapin, and Maja Remškar. The Transformation Pathways of  $\text{Mo}_6\text{S}_2\text{I}_8$  Nanowires into Morphology-Selective  $\text{MoS}_2$  Nanostructures, *The Journal of Physical Chemistry C* 2010 114 (14), 6458-6463 DOI: 10.1021/jp101298g
- [2] Marko Viršek, Nikola Novak, Cene Filipič, Peter Kump, Maja Remškar, and Zdravko Kutnjak, *J. Appl. Phys.* 112, 103710 (2012), <https://doi.org/10.1063/1.4766451>
- [3] Wilford N Hansen, Galen J Hansen, Standard reference surfaces for work function measurements in air, *Surface Science*, Volume 481, Issues 1–3, 2001, Pages 172-184, ISSN 0039-6028, [https://doi.org/10.1016/S0039-6028\(01\)01036-6](https://doi.org/10.1016/S0039-6028(01)01036-6).
- [4] Xiao Li, Hongwei Zhu, Two-dimensional  $\text{MoS}_2$ : Properties, preparation, and applications, *Journal of Materiomics*, Volume 1, Issue 1, 2015, Pages 33-44, ISSN 2352-8478, <https://doi.org/10.1016/j.jmat.2015.03.003>.
